# Supplementary material for: Childhood Emotional Neglect and Adolescent Depression: Assessing the Protective Role of Peer Social Support in a Longitudinal Birth Cohort
Source: Frontiers journal article supplement (doi:10.3389/fpsyt.2021.681176), 2021-08-09
Supplement: Data_Sheet_1.PDF [file Data_Sheet_1.PDF]

## *Supplementary Material*

**Supplementary Table 1.**

ALSPAC variables used from adverse childhood experiences (ACEs) for defining emotional neglect and recoding of emotional neglect variables.

| <b>Description</b>                                                                               | <b>Recoding</b>                                                   | <b>Dichotomizing strategy</b> | <b>Age reported</b> |
|--------------------------------------------------------------------------------------------------|-------------------------------------------------------------------|-------------------------------|---------------------|
| Frequency child feels left out of things                                                         | 1=always, 2=sometimes, 3=often, 4=never                           | 1=always                      | 97m                 |
| Study child is understood by parent(s)                                                           | 1=not true, 2=mostly untrue, 3=partly true, 4=mostly true, 5=true | 1=not true                    | 116m                |
| Frequency carers ask teenager what happened in their free time                                   | 1=never, 2=hardly ever, 3=sometimes, 4=most of time, 5=always     | 1=never                       | 12.5yrs             |
| Frequency past month carers started conversation about teenager's spare time                     | 1=never, 2=hardly ever, 3=sometimes, 4=most of time, 5=always     | 1=never                       | 12.5yrs             |
| Frequency carers take time to listen, when teenager talks about what happened in their free time | 1=never, 2=hardly ever, 3=sometimes, 4=most of time, 5=always     | 1=never                       | 12.5yrs             |
| Frequency carers know who teenager's friends are, outside of school                              | 1=never, 2=hardly ever, 3=sometimes, 4=most of time, 5=always     | 1=never                       | 12.5yrs             |
| Frequency carers ask teenager what happened at school, on a normal day school day                | 1=never, 2=hardly ever, 3=sometimes, 4=most of time, 5=always     | 1=never                       | 12.5yrs             |
| Frequency carers ask teenager what happened in free time                                         | 1=never, 2=hardly ever, 3=sometimes, 4=most of time, 5=always     | 1=never                       | 13.5yrs             |
| Frequency past month carers started conversation about teenager's spare time                     | 1=never, 2=hardly ever, 3=sometimes, 4=most of time, 5=always     | 1=never                       | 13.5yrs             |
| Frequency carers take time to listen, when teenager talks about what happened in free time       | 1=never, 2=hardly ever, 3=sometimes, 4=most of time, 5=always     | 1=never                       | 13.5yrs             |
| Frequency carers know who teenagers friends are, outside of school                               | 1=never, 2=hardly ever, 3=sometimes, 4=most of time, 5=always     | 1=never                       | 13.5yrs             |
| Frequency carers ask teenager what has happened at school, on normal school day                  | 1=never, 2=hardly ever, 3=sometimes, 4=most of time, 5=always     | 1=never                       | 13.5yrs             |
| YP spoke to mother or female adult about how things are going with friends in the last month     | 4=most days, 3=sometimes, 2=rarely, 1=never                       | 1=never                       | 14yrs               |

|                                                                                                          |                                                                                |                  |         |
|----------------------------------------------------------------------------------------------------------|--------------------------------------------------------------------------------|------------------|---------|
| YP spoke to father or male adult about how things are going with friends in the last month               | 4=most days, 3=sometimes, 2=rarely, 1=never                                    | 1=never          | 14yrs   |
| YP spoke to mother or female adult about how things are going at school in the last month                | 4=most days, 3=sometimes, 2=rarely, 1=never                                    | 1=never          | 14yrs   |
| YP spoke to father or male adult about how things are going at school in the last month                  | 4=most days, 3=sometimes, 2=rarely, 1=never                                    | 1=never          | 14yrs   |
| Frequency carer asks YP what they did in their free time                                                 | 1=never, 2=hardly ever, 3=sometimes, 4=most of time, 5=always                  | 1=never          | 15.5yrs |
| Frequency carer started conversation about YPs free time, in last month                                  | 1=never, 2=hardly ever, 3=sometimes, 4=most of time, 5=always                  | 1=never          | 15.5yrs |
| Frequency carer listens to YP, when they talk about what they they did in their free time                | 1=never, 2=hardly ever, 3=sometimes, 4=most of time, 5=always                  | 1=never          | 15.5yrs |
| Frequency carer knows the friends that YP has outside school                                             | 1=hardly ever, 2=sometimes, 3=most of time, 4=always                           | 1=hardly ever    | 15.5yrs |
| Frequency carer asks YP about what happened at school on normal school day                               | 1=never, 2=hardly ever, 3=sometimes, 4=most of time, 5=always                  | 1=never          | 15.5yrs |
| Frequency over last term parents have asked YP how they are getting on with different subjects at school | 4=most days, 3=sometimes, 2=rarely, 1=never                                    | 1=never          | 16 yrs  |
| How easy YP finds it to discuss their problems with anyone in their family                               | 5=very easy, 4=quite difficult, 3=neutral, 2=quite difficult, 1=very difficult | 1=very difficult | 17.5yrs |

**Supplementary Table 2.**

Perceived peer social support variables were measured by the 5-item shortened version of the Cambridge Hormones and Moods Project Friendship questionnaire in ALSPAC. These five variables were summed to create one total score for social support at age 15 and were used in imputation and statistical analyses.

| <b>Description</b>                            | <b>Recoding</b>                                         | <b>Age reported</b> |
|-----------------------------------------------|---------------------------------------------------------|---------------------|
| Teenager is happy with number of friends      | 3=Very happy, 2=Quite happy, 1=Quite unhappy, 0=Unhappy | 15yrs               |
| Frequency teenager sees friends out of school | 3=almost every day, 2= at least once per week 1=less    | 15yrs               |

|                                                                |                                                                  |       |
|----------------------------------------------------------------|------------------------------------------------------------------|-------|
|                                                                | than once per week,<br>0=hardly ever or never                    |       |
| Teenager believes friends understand them                      | 3=most of the time,<br>2=sometimes, 1=not often,<br>0=not at all | 15yrs |
| Teenager talks about problems with friends                     | 3=most of the time,<br>2=sometimes, 1=not often,<br>0=not at all | 15yrs |
| Degree to which teenager is happy with his/her friends overall | 3=most of the time,<br>2=sometimes, 1=not often,<br>0=not at all | 15yrs |
